# Supplementary material
Source: PubMed Central journal article supplement (PMC6745703)
Supplement: NIHMS1036650-supplement-Supplementary_Info.pdf [file NIHMS1036650-supplement-Supplementary_Info.pdf]

In the format provided by the authors and unedited.

# Adaptive endoplasmic reticulum stress signalling via IRE1 $\alpha$ -XBP1 preserves self-renewal of haematopoietic and pre-leukaemic stem cells

Lu Liu<sup>1</sup>, Meiling Zhao<sup>1</sup>, Xi Jin<sup>1</sup>, Gina Ney<sup>2</sup>, Kevin B Yang<sup>1</sup>, Fanglue Peng<sup>3</sup>, Jin Cao<sup>3</sup>, Takao Iwawaki<sup>4</sup>, Juan Del Valle<sup>5</sup>, Xi Chen<sup>3</sup> and Qing Li<sup>1,6\*</sup> 

---

<sup>1</sup>Department of Internal Medicine, University of Michigan, Ann Arbor, MI, USA. <sup>2</sup>Department of Pediatrics, University of Michigan, Ann Arbor, MI, USA. <sup>3</sup>Molecular and Cellular Biology in the Breast Center, Baylor College of Medicine, Houston, TX, USA. <sup>4</sup>Division of Cell Medicine, Kanazawa Medical University, Uchinada, Japan. <sup>5</sup>Department of Chemistry, University of South Florida, Tampa, FL, USA. <sup>6</sup>Department of Cell and Developmental Biology, University of Michigan, Ann Arbor, MI, USA. \*e-mail: [lqing@umich.edu](mailto:lqing@umich.edu)

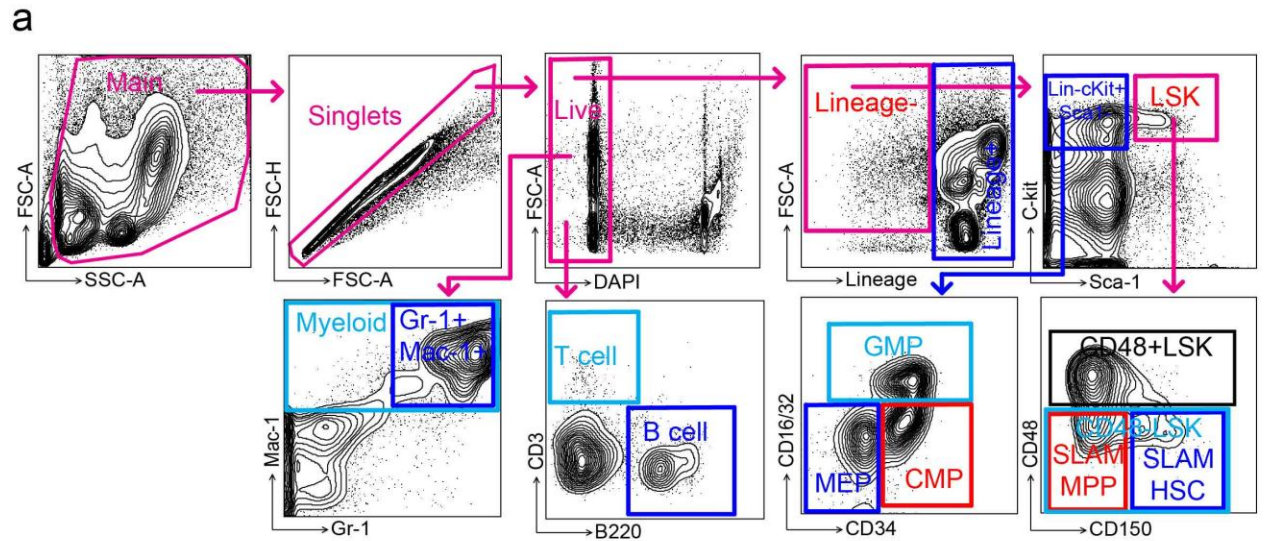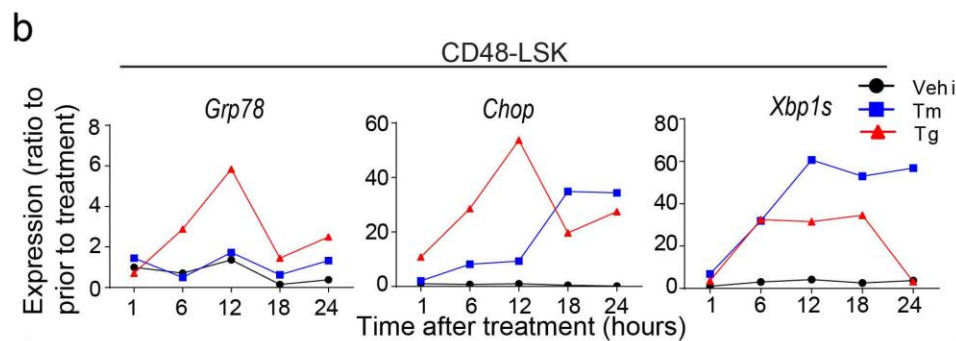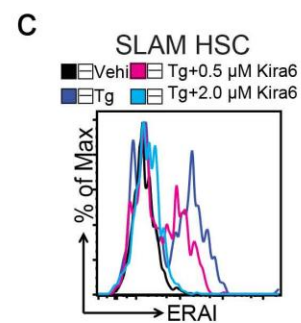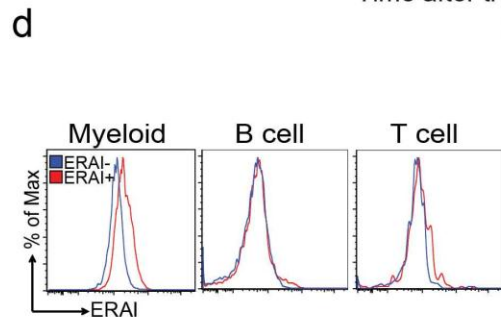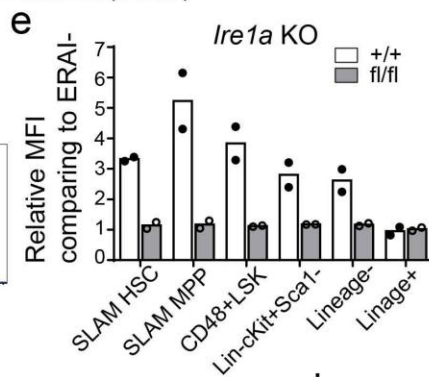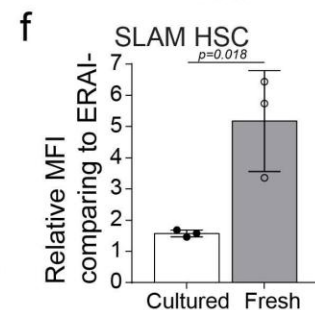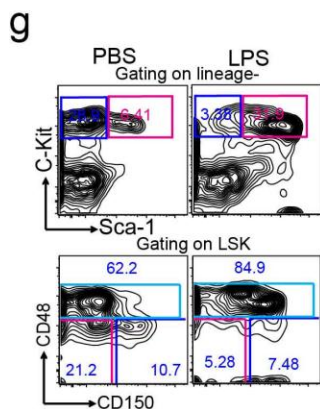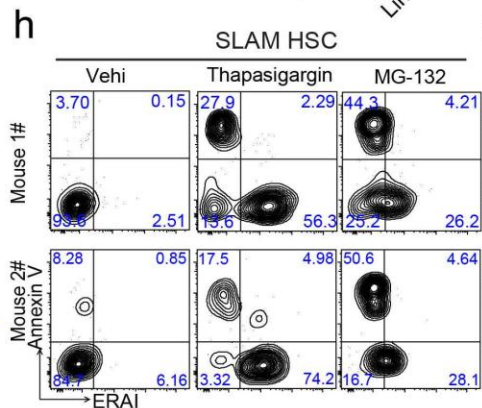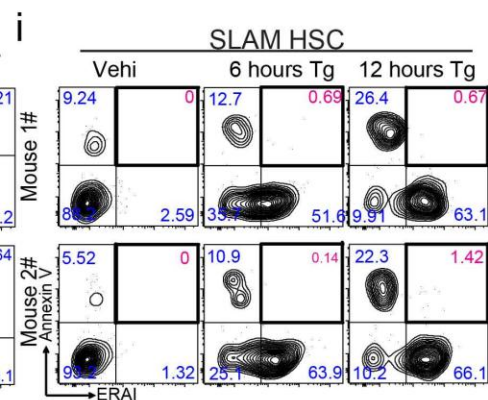

## Supplementary Figure 1.

ER stress activates UPR in murine long-term HSCs

**a**, Gating strategy for FACS analysis and sorting of haematopoietic populations. **b**, Summary of qRT-PCR of UPR genes in purified CD48<sup>+</sup>LSKs treated with Tunicamycin or Thapsigargin for 1-24 hours. Levels were normalized to that of cells treated with vehicle for 1 hour. Bone marrow cells were pooled from 3 mice and FACS sorted for different haematopoietic populations. n=2 pools of samples were analyzed by qRT-PCR. **c**, Representative FACS plot showing ERAI signal in wild type HSCs treated with Thapsigargin (Tg) for 18 hours, together with IRE1 $\alpha$  kinase inhibitor Kira6 (n=3 biological replicates in 3 independent experiments). **d**, Representative FACS plot showing ERAI signal in Myeloid (Mac-1<sup>+</sup>), B cell (B220<sup>+</sup>), T cell (CD3<sup>+</sup>) of wild type mice (3 biological replicates in 3 independent experiments). ERAI signal in HSCs isolated from mice without ERAI transgene (ERAI<sup>-</sup>) was used as negative control. **e**, Relative ERAI signal intensity (normalized to level in ERAI negative cells) in haematopoietic populations from *Mx1-cre*<sup>+</sup>; *ERAI*<sup>+</sup>; *Ire1 $\alpha$ <sup>fl/fl</sup>* and *Mx1-cre*<sup>-</sup>; *ERAI*<sup>+</sup>; *Ire1 $\alpha$ <sup>fl/fl</sup>* (+/+) mice 2 weeks after plpC injection (n=2 biological replicates in 2 independent experiments). **f**, ERAI signal intensity of HSCs freshly isolated from wild type mice (Fresh) or cultured for 12 hours (cultured) (n=3 biological replicates in 3 independent experiments). **g**, Representative FACS plot of haematopoietic stem and progenitor populations from wild type mice 24 hours after LPS injection (2 mg/kg body weight) (3 biological replicates in 3 independent experiments). **h**, FACS plot of Annexin V staining and ERAI signal in purified HSCs after 18 hours of Thapsigargin and proteasome inhibitor MG-132 treatment (2 biological replicates in 2 independent experiments). **i**, Representative FACS plot of Annexin V staining and ERAI signal in purified wild type HSC after 6-12 hours of Thapsigargin treatment (2 biological replicates in 2 independent experiments). Data represent mean $\pm$ s.d. for all panels. Two-sided student t-test was used for statistical analysis.

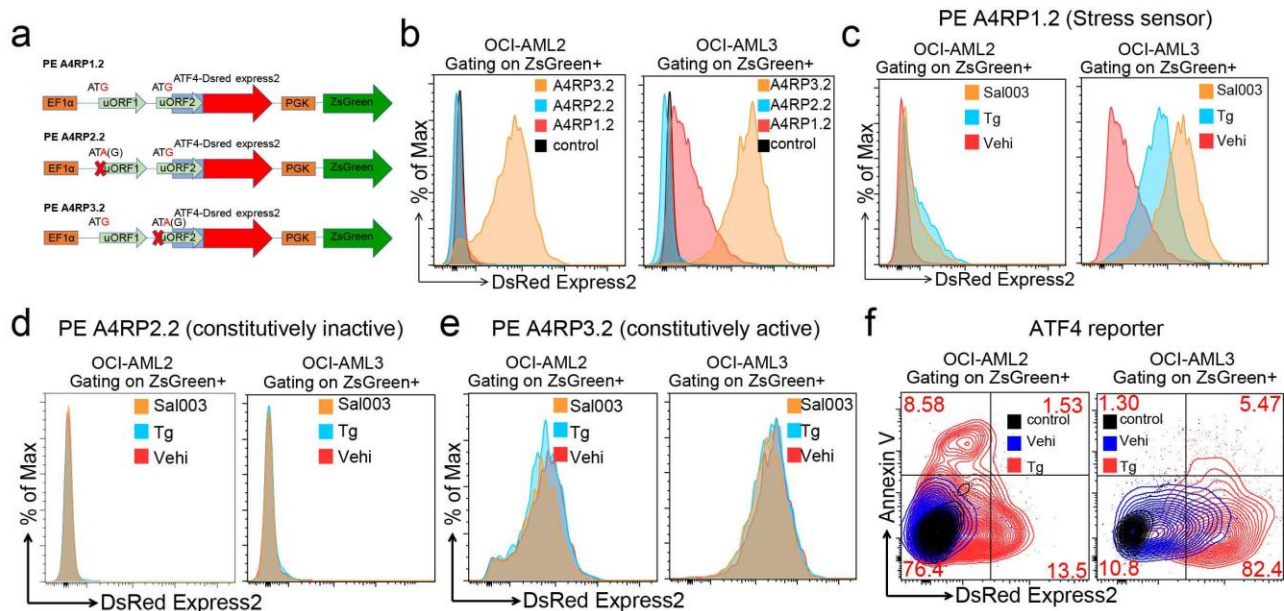

## Supplementary Figure 2

PERK activation as indicated by ATF4 reporter activity didn't predict apoptosis in AML cell lines

**a**, Lentiviral construct that expresses reporter gene DsRed express 2 under control of ATF4 uORFs that are activated by eIF2 $\alpha$  (stress sensor, PE A4RP1.2), and its controls that express either constitutively active (PE A4RP3.2) or inactive (PE A4RP2.2) DsRed expression. **b**, Representative FACS plot of basal DsRed express 2 level in OCI-AML2 and OCI-AML3 cells transduced with these constructs. **c-e**, Representative FACS plots of DsRed Express 2 level in OCI-AML2 and OCI-AML3 cells transduced with stress sensor (**c**), constitutively inactive (**d**), or constitutively active (**e**) ATF4 reporter constructs and treated with vehicle (vehi), 5 mM Thapsigargin (Tg) or 10  $\mu$ M Sal003 for 24 hours. Analysis was done on transduced cells (gated on ZsGreen positive cells). **f**, Representative FACS plots of Annexin V staining and ATF4 reporter signal in OCI-AML and OCI-AML3 cells treated with vehicle (vehi), 5 mM Thapsigargin (Tg) or 10  $\mu$ M Sal003 for 24 hours (2 biological replicates in 2 independent experiments).

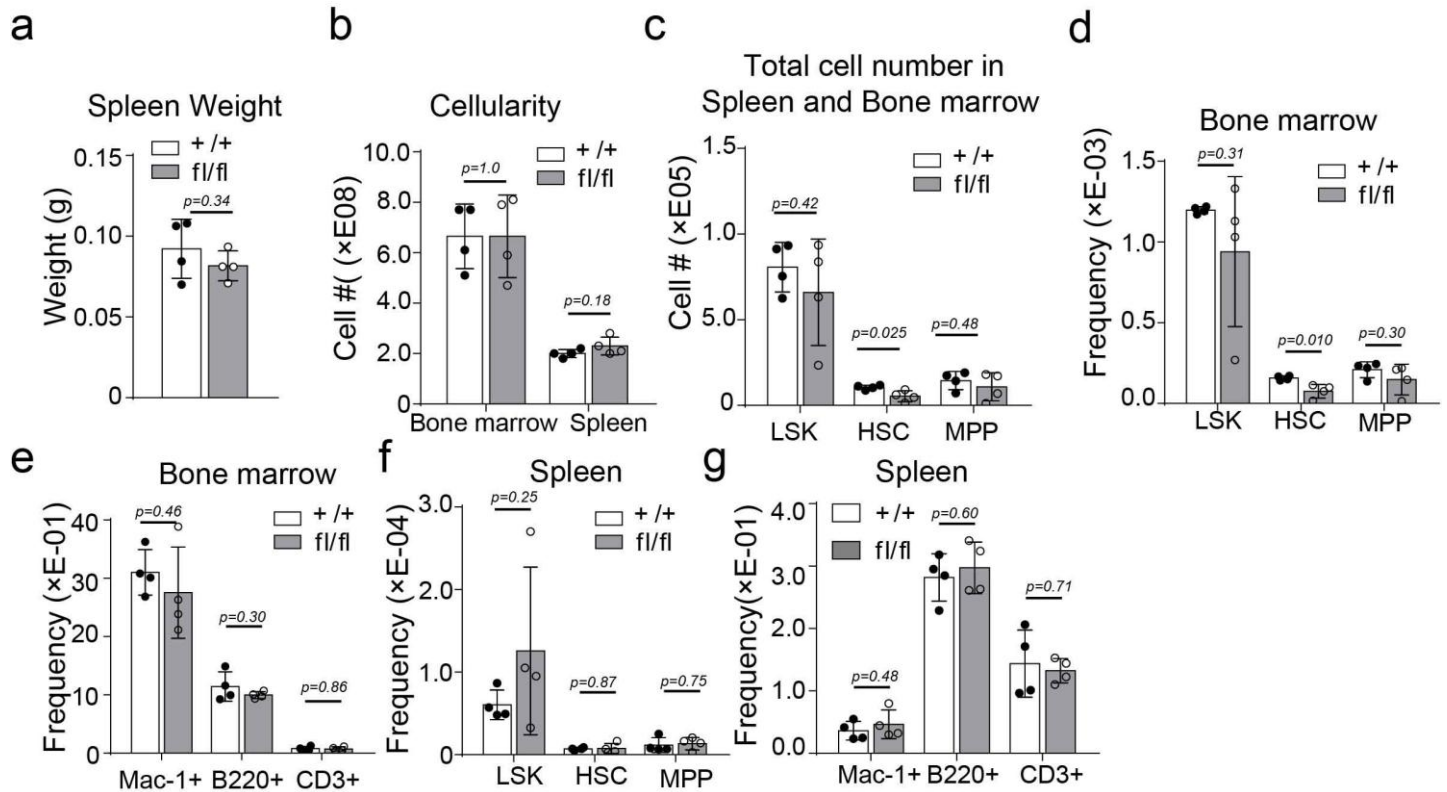

**Supplementary Figure 3**

Effects of IRE1 $\alpha$  Knock-out on steady-state haematopoiesis.

**a-g**, Analysis of steady-state haematopoiesis in age- and sex-matched *Mx1-cre*<sup>+</sup>; IRE1 $\alpha$ <sup>fl/fl</sup> (f/f) and *Mx1-cre*<sup>-</sup>; IRE1 $\alpha$ <sup>fl/fl</sup> (+/+) mice at least 2 weeks post-plpC injection (n=4 biological replicates in 4 independent experiments). **a**, Spleen weight. **b**, Cellularity in Bone marrow and spleen. **c**, Total numbers of haematopoietic stem and progenitor cells in the bone marrow and spleen. **d**, Frequency of haematopoietic stem and progenitor cells in bone marrow. **e**, Frequency of myeloid (Mac-1+), B (B220+) and T (CD3+) cells in the bone marrow. **f**, Frequency of haematopoietic stem and progenitor cells in the spleen. **g**, Frequency of myeloid (Mac-1+), B (B220+) and T (CD3+) cells in the spleen. Data represent mean $\pm$ s.d. Two-sided student t-test was used for statistical analysis.

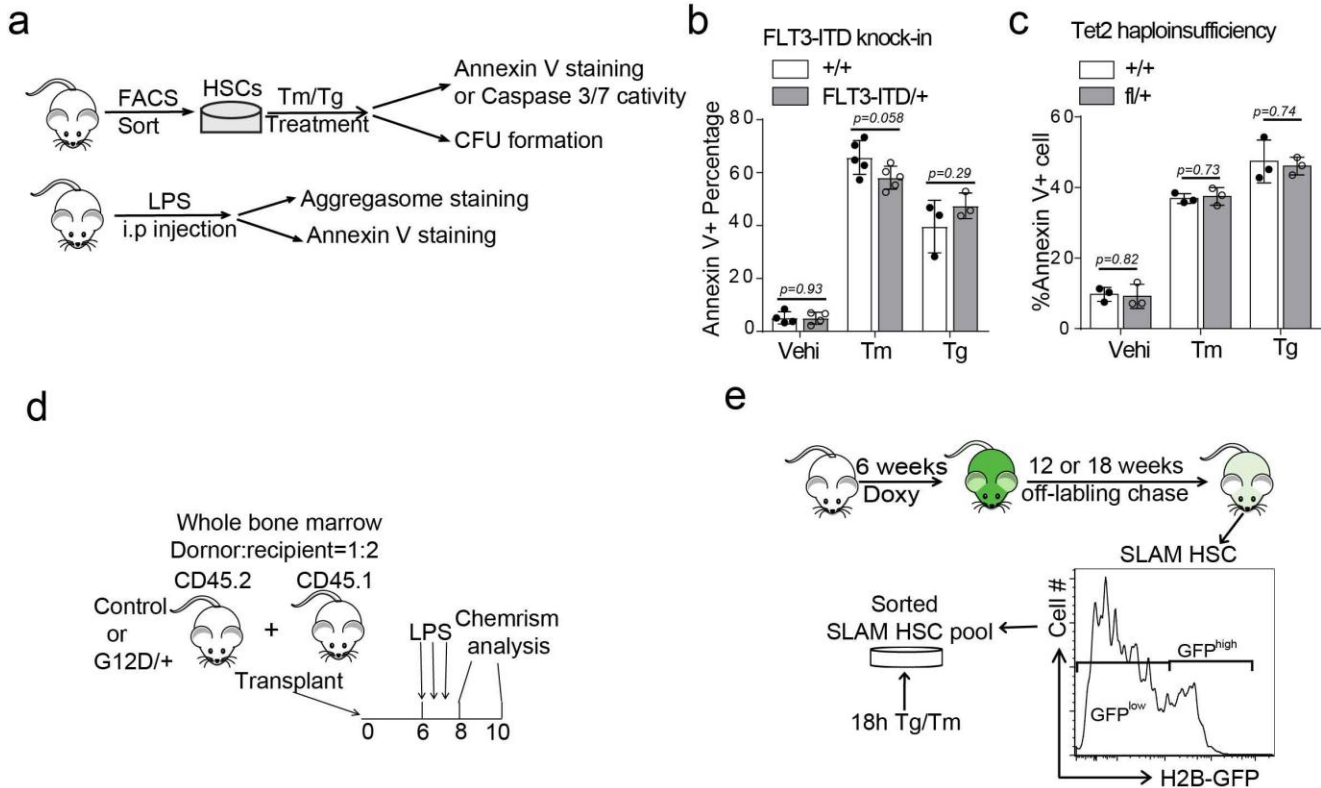

**Supplementary Figure 4**

N-Ras<sup>G12D</sup> but not FLT3-ITD or Tet2 haploinsufficiency leads to HSC protection from ER stress-induced apoptosis

**a**, Experimental scheme of the assay for results depicted in **Figure 2a-e**, **b**, Summary of the percentage of Annexin V positive cells in HSCs purified from 8-10 weeks old *FLT3-ITD* knock-in mice (*FLT3-ITD/+*) and sex-matched littermate control mice ( $+/+$ ) and treated 18 hours of 0.6  $\mu$ g/ml Tunicamycin(Tm) and 0.2  $\mu$ M Thapsigargin (Tg) ( $n=3-5$  biological replicates in 3 independent experiments). **c**, Summary of apoptosis analysis of HSCs from *Mx1-cre<sup>-</sup>; Tet2<sup>fl/+</sup>* ( $+/+$ ) or *Mx1-cre<sup>+</sup>; Tet2<sup>fl/+</sup>* (fl/+) mice at least 2 weeks after 6 dose of plpC injection, and treated with 18 hours of 0.6  $\mu$ g/ml Tunicamycin(Tm) and 0.2  $\mu$ M Thapsigargin (Tg) ( $n=3$  biological replicates in 1 independent experiments). **d**, Experimental scheme of chimerism maintenance experiment for **Figure 2f**. 0.5 million bone marrow cells from *Mx1-cre<sup>+</sup>; Nras<sup>G12D/+</sup>* (G12D/+) or control CD45.2 mice (2 weeks after plpC injection) were transplanted with 0.5 million competitor (CD45.1) bone marrow cells into recipient mice. Six weeks after transplantation, transplant recipients were injected with 2 mg/kg LPS for 3 doses every other day and HSCs chimerism was analyzed 2-4 weeks after LPS injections. **e**, Experimental scheme of analysis in *Col1a1-H2B-GFP; Rosa26-M2-rtTA* mice. Mice were treated with doxycycline for 6 weeks to label HSCs with GFP, after which doxycycline water was removed to allow HSCs to dilute GFP signal upon cell division. GFP<sup>high</sup> and GFP<sup>low</sup> HSCs (Gating strategy to separate GFP<sup>high</sup> and GFP<sup>low</sup> HSCs is shown on the bottom right) were purified after 18 weeks off doxycycline and were treated with Tg or Tm for 18 hours. Data represent mean $\pm$ s.d. for panels **b** and **c**. Two-sided student t-test was used for statistical analysis.

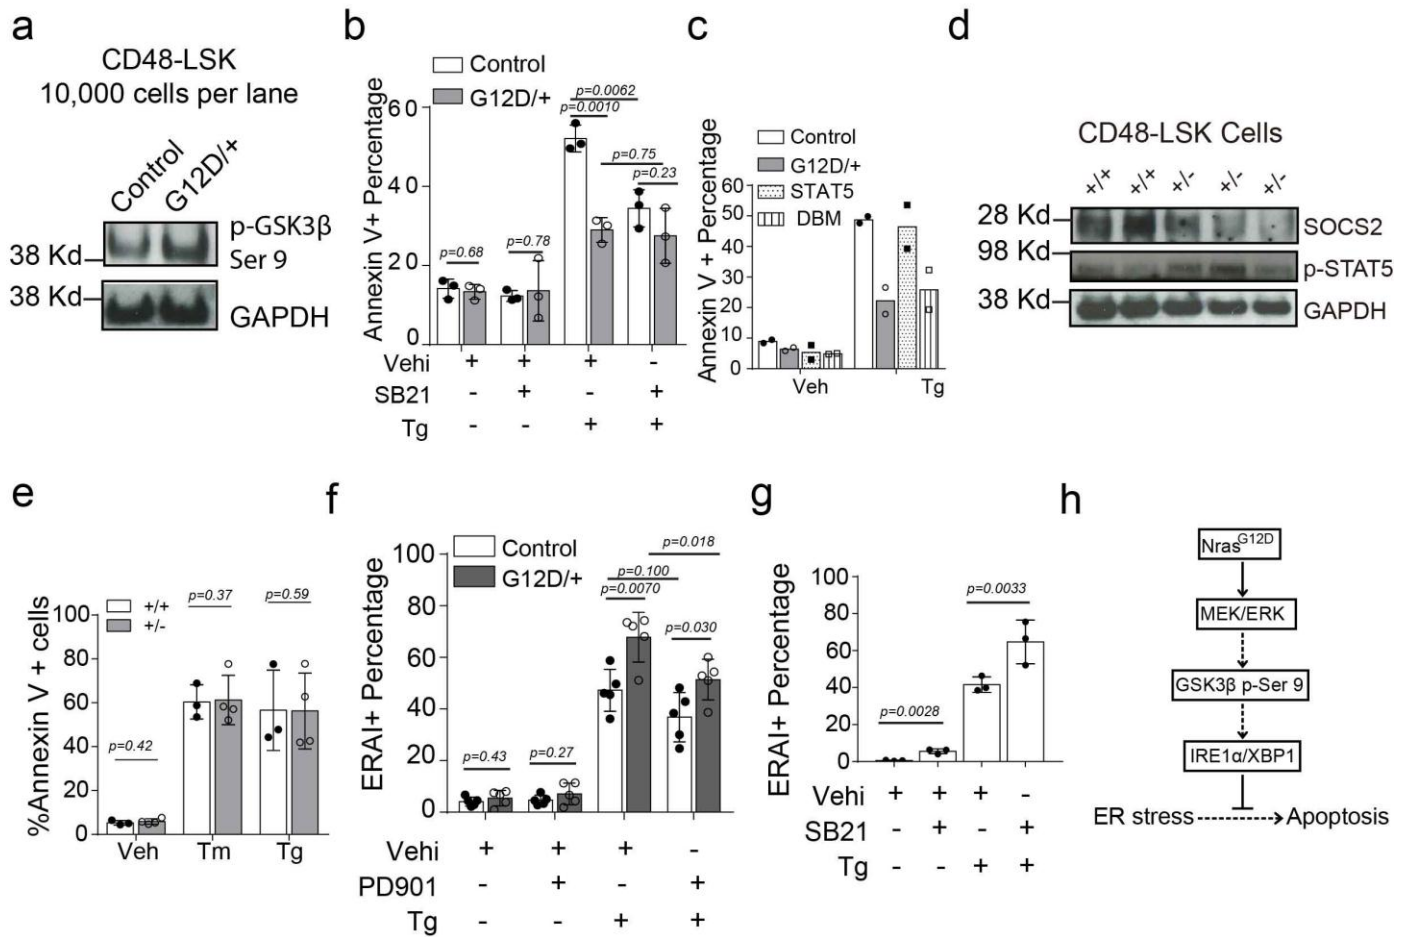

### Supplementary Figure 5

MEK/ERK/GSK3β but not STAT5 is required for N-Ras<sup>G12D</sup> mediated protection under ER stress

**a**, Representative Western blot detecting phosphorylation of Serine 9 of GSK3β in CD48-LSK purified from *Mx1-cre<sup>-/-</sup>; Nras<sup>G12D/+</sup>*

(Control), or *Mx1-cre<sup>-/-</sup>; Nras<sup>G12D/+</sup>* (G12D/+), and then cultured for 10 minutes in the presence of 10 ng/ml SCF/TPO (3 biological replicates in 3 independent experiments). Original blots are shown in **Supplementary Figure 7**.

**b**, Summary of the percentage of Annexin V positive HSC purified from *Mx1-cre<sup>-/-</sup>; Nras<sup>G12D/+</sup>* (Control), or *Mx1-cre<sup>-/-</sup>; Nras<sup>G12D/+</sup>* (G12D/+ mice that were treated with 0.2 μM Thapsigargin (Tg) together with 5 μM GSK3β inhibitor SB216763 (SB21) for 18 hours (n=3 independent experiments).

**c**, Summary of the percentage of Annexin V positive HSCs from *Mx1-cre<sup>-/-</sup>; Nras<sup>G12D/+</sup> stat5a/b<sup>fl/+</sup>* or *Mx1-cre<sup>-/-</sup>; Nras<sup>G12D/+</sup> stat5a/b<sup>+/+</sup>* (Control), *Mx1-cre<sup>-/-</sup>; Nras<sup>G12D/+</sup>* (G12D/+), *Mx1-cre<sup>-/-</sup>; stat5a/b<sup>fl/+</sup>* (STAT5), or *Mx1-cre<sup>-/-</sup>; Nras<sup>G12D/+</sup> stat5a/b<sup>fl/+</sup>* double mutant (DBM) mice after 0.6 μg/ml Tunicamycin (Tm) or 0.2 μM Thapsigargin(Tg) treatment for 18 hours (n=2 biological replicates in 2 independent experiments).

**d**, Western blot detecting the level of SOCS2 and phosphorylation of STAT5 in CD48-LSK cells purified from SOCS2<sup>+/+</sup> (+/+) and

SOCS2<sup>+/-</sup> (+/-) mice. Original blots are shown in **Supplementary Figure 7**. (2-3 biological replicates in 1 independent experiments) **e**, Summary of the percentage of Annexin V positive CD48-LSK cells purified from 6-12 weeks old SOCS2<sup>+/+</sup> (+/+) and SOCS2<sup>+/-</sup> (+/-) mice that were treated with 0.6 µg/ml Tunicamycin (Tm) or 0.2 µM Thapsigargin (Tg) for 18 hours (n=3 biological replicates for +/+, n=4 biological replicates for +/-, pooled from 2 independent experiments). **f**, Summary of the percentage of ERAI positive HSC purified from *Mx1-cre<sup>-</sup>; ERAI<sup>+</sup>; Nras<sup>G12D/+</sup>* (Control), or *Mx1-cre<sup>+</sup>; ERAI<sup>+</sup>; Nras<sup>G12D/+</sup>* (G12D/+) mice that were treated with 0.2 µM Thapsigargin (Tg) together with 100nM MEK inhibitor PD0325901 for 18 hours (n=5 biological replicates in 5 independent experiments). **g**, Summary of the percentage of ERAI positive HSC purified from *ERAI<sup>+</sup>* mice treated with 0.2 µM Thapsigargin(Tg) together with 5 µM GSK3β inhibitor SB216763 (SB21) for 18 hours (n=3 biological replicates in 3 independent experiments). **h**, Schematic model showing that N-Ras<sup>G12D</sup>-activated MEK/ERK signaling leads to phosphorylation and inhibition of GSK3β which results in activation of the adaptive IRE1α -XBP1 ER stress signaling to protect HSCs from ER stress-induced apoptosis. Data represent mean±s.d. . Two-sided student t-test was used for statistical analysis.



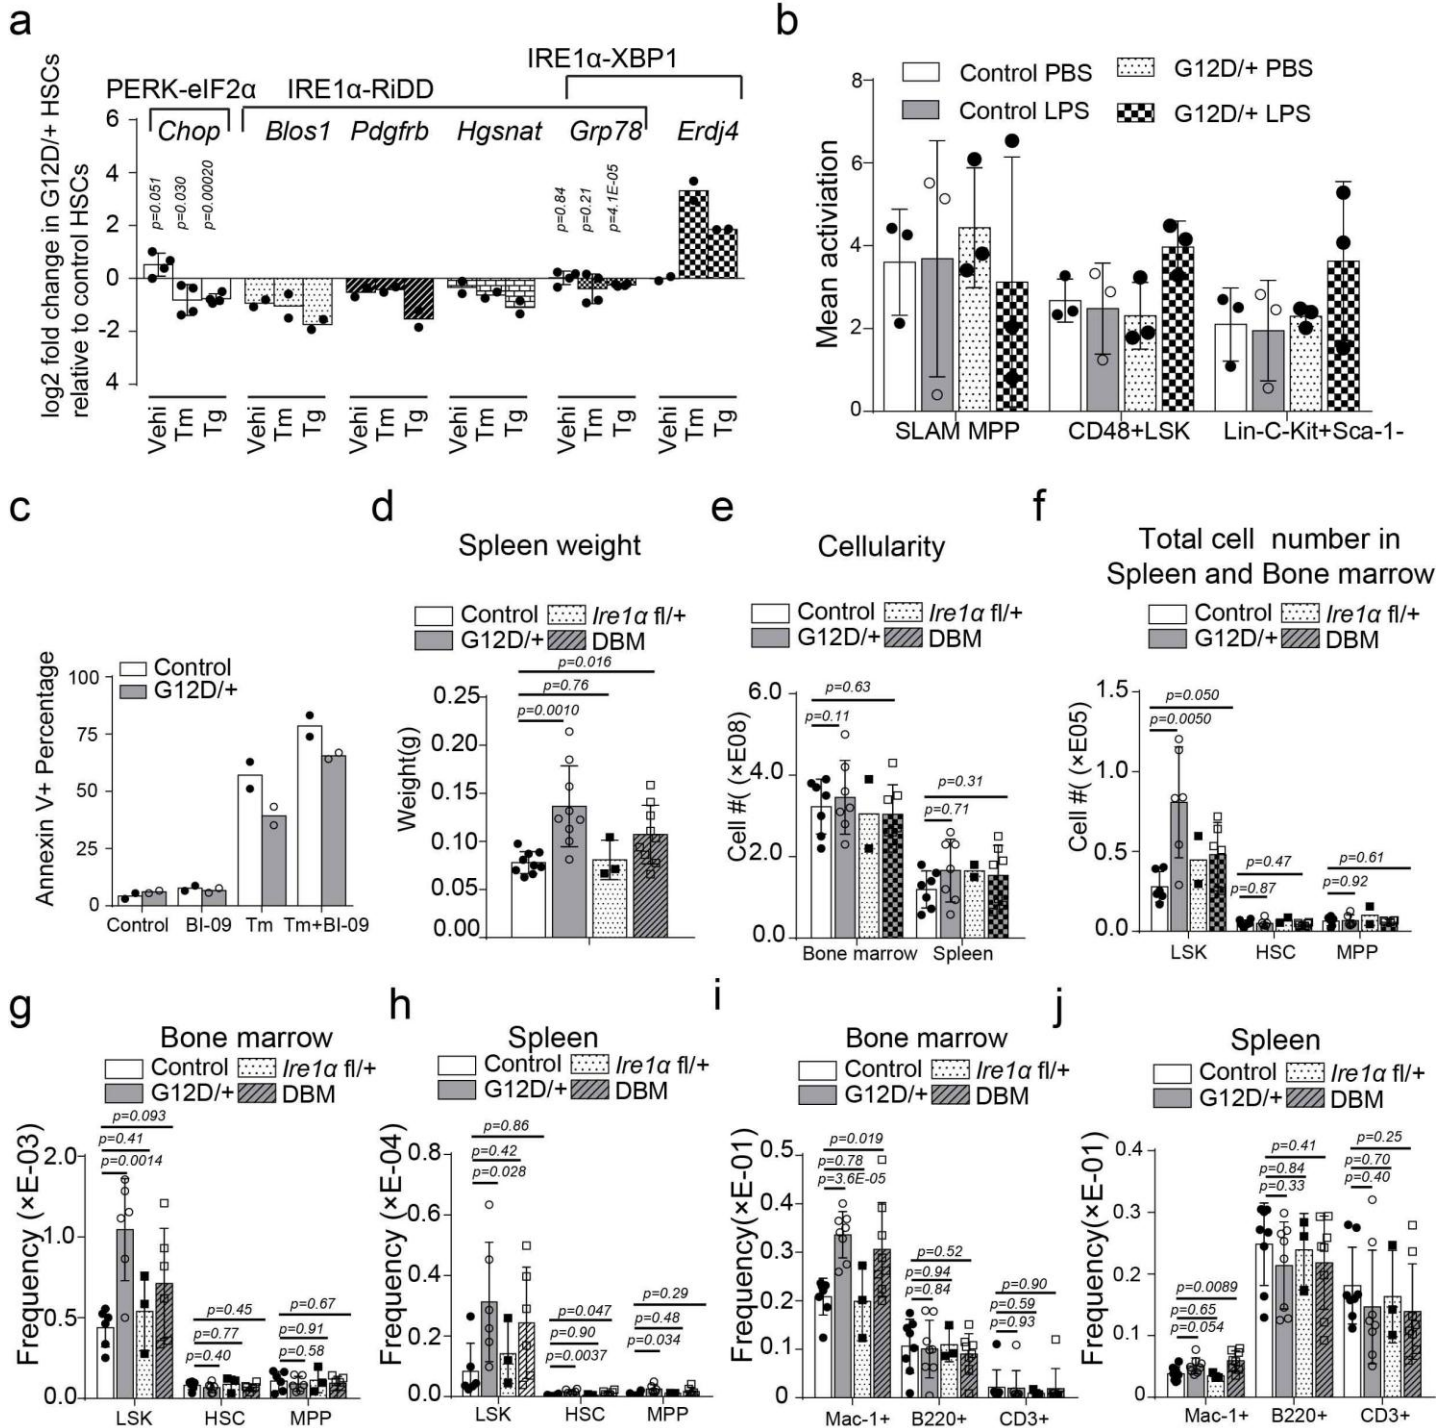

**Supplementary Figure 6**

IRE1 $\alpha$  is hyper-activated in *Nras*<sup>G12D</sup> HSCs and is required for N-Ras<sup>G12D</sup> mediated HSC protection, LSK and myeloid expansion.

**a**, Log ratio of the level of UPR target genes (measured by qRT-PCR) in *Nras* mutant HSCs relative to the level in control HSCs after tunicamycin (Tm) or thapsigargin (Tg) treatment (n=4 biological replicates in 2 independent experiments for *Chop*, *Grp78*, n=2 biological replicates in 2 independent experiments for *Blos1*, *Pdgrfb*, *Hgsnat*, *Erdj4*).

**b**, Activation of IRE1 $\alpha$  in different haematopoietic

populations from *Mx1-cre<sup>-</sup>; ERAI<sup>f</sup>; Nras<sup>G12D/+</sup>* (Control), or *Mx1-cre<sup>+</sup>; ERAI<sup>f</sup>; Nras<sup>G12D/+</sup>* (G12D/+) mice injected with LPS was measured by mean induction of ERAI signal (Mean florescent intensity of ERAI in ERAI+ cells relative to ERAI- cells). (n=3 biological replicates in 3 independent experiments). **c**, Summary of the percentage of Annexin V positive HSC from *Mx1-cre<sup>-</sup>; Nras<sup>G12D/+</sup>* (Control), *Mx1-cre<sup>+</sup>; Nras<sup>G12D/+</sup>* (G12D/+) that were treated with 0.6 µg/ml tunicamycin (Tm) together with 20 µM IRE1α inhibitor BI-09 for 18 hours (n=2 biological replicates in 2 independent experiments). **d-j**, The steady state haematopoiesis in age- and sex-matched *Mx1-cre<sup>-</sup>; Nras<sup>G12D/+</sup>; Ire1α<sup>fl/+</sup>* (control), *Mx1-cre<sup>+</sup>; Nras<sup>G12D/+</sup>; Ire1α<sup>+/+</sup>* (G12D/+) , *Mx1-cre<sup>+</sup>; Nras<sup>+/+</sup>; Ire1α<sup>fl/+</sup>* (Ire1α fl/+) , *Mx1-cre<sup>+</sup>; Nras<sup>G12D/+</sup>; Ire1α<sup>fl/+</sup>* (DBM) mice was analyzed 2 weeks post-plpC injection. **d** Spleen weight. n=9 (control, G12D/+ and DBM), and 3 (IRE1α fl/+) biological replicates in 6 independent experiments, **e**, Cellularity in Bone marrow and spleen. .n=7 (control, G12D/+ and DBM), and 2 (IRE1α fl/+) biological replicates in 6 independent experiments, **f**, Total numbers of haematopoietic stem and progenitor cells in bone marrow and spleen. .n=6 (control, G12D/+ and DBM), and 2 (IRE1α fl/+) biological replicates in 6 independent experiments, **g-h**, Frequency of haematopoietic stem and progenitor cells in bone marrow (**g**) and spleen (**h**). . n=6 (control, G12D/+ and DBM), and 3 (IRE1α fl/+) biological replicates in 6 independent experiments, **i-j**, Frequency of lineage cells in bone marrow (**i**) and spleen (**j**). . n=8 (control, G12D/+ and DBM), and 3 (IRE1α fl/+) biological replicates in 6 independent experiments, Data represent mean±s.d. Two-sided student t-test was used for statistical analysis.

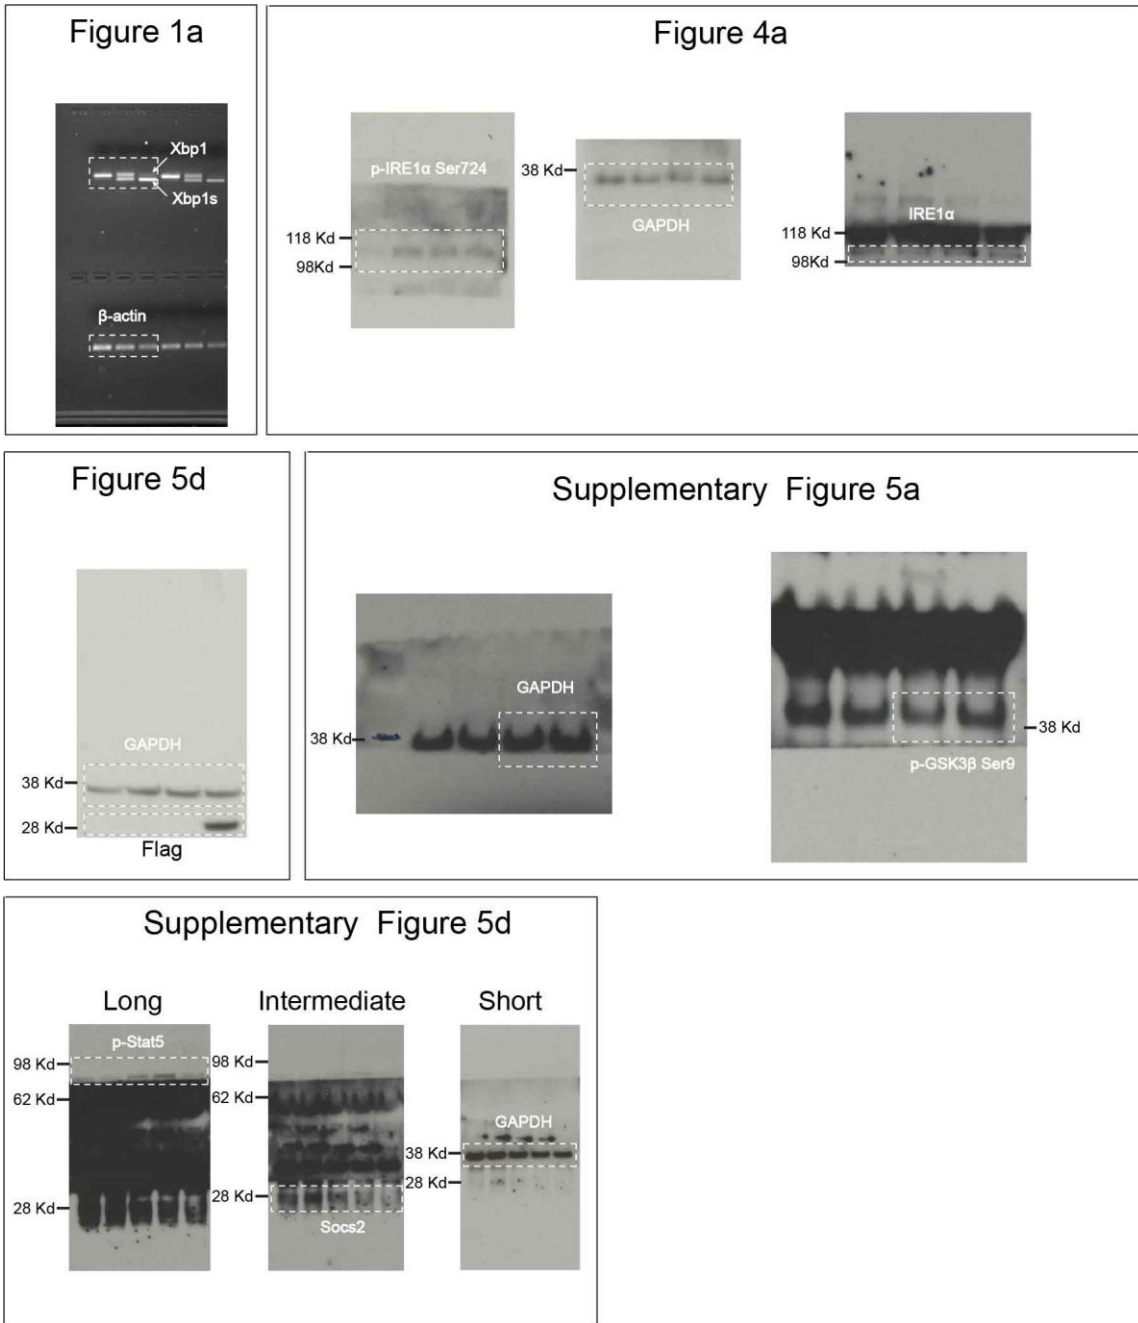

**Supplementary Figure 7**

Original images of Western blots and DNA gel.

While boxes indicate the images used for figures. Because of the small number of HSCs (5,000-10,000 cells/mouse) or CD48-LSK (contains HSCs and MPPs; 20,000-30,000 cells/mouse), to ensure adequate protein amount, the entire protein lysates from one set of FACS-sorted samples were used for one SDS-PAGE gel. The Western membranes were then sectioned into 3-4 strips based on molecular weight of the standard protein ladder, to allow simultaneous probing for multiple proteins on using the same protein samples. Images for Supplementary Figure 5d represents a Western membrane that was cut into 4 strips, each probed for different antibody. The strips were then aligned together for autoradiography. Three different exposure times were included to show the detection of different proteins.

Supplementary Table 1. List of all antibodies used for experiments.

Supplementary Table 2. Statistics source data.
